# Supplementary material
Source: Springer Nature journal article supplement (https://www.springermedizin.de/resource/supplementary/12883_2010_420_MOESM2_ESM.pdf/9455366)
Supplement: MOESM2 [file 9455366]

## **CINCINNATI STROKE SCALE FOR EMERGENCY MEDICAL DISPATCHERS**

### **Scripted Cincinnati Stroke Scale for Emergency Medical Dispatchers\***

**I want you to get close to him/her and ask three questions.**

**Tell me when you are ready**

#### **1. Ask him/her to smile (Score)**

Normal (0)

Slight difference (1)

Obvious difference (3)

Cannot complete at all

#### **2. Ask her/him to raise both arms above her/his head (Score)**

Both arms raised equally (0)

One arm higher than the other (1)

Only one arm raised (3)

Cannot complete request at all

#### **3. Ask him/her to say (Score)**

The early bird catches the worm

Was she/he able to repeat it correctly?

Said correctly (0)

Slurred speech (3)

Garbled or not understandable speech (3)

Cannot complete request at all

Add up the score that are assigned to each answer in the SCORE column (Automated in Pro-QA, computerized version of the protocols)

$\geq 3$  = Clear evidence of stroke

2 = Strong evidence of stroke

1 = Partial evidence of stroke

0 = No evidence of stroke
